# Supplementary material
Source: publisher figshare collection journal article supplement (https://sage.figshare.com/ndownloader/files/12968333)

**APPENDIX 1.** Details of the cost computation for (a) sigmoidoscopy (FS) and (b) FIT at first and subsequent rounds, respectively.

(a)

|                                              |         |
|----------------------------------------------|---------|
| <b>Programme organization and evaluation</b> |         |
| Patients invitable in 1 year                 | 12,350  |
| Yearly cost per 1 epidemiologist, €          | 115,084 |
| Yearly cost per 1 administrative, €          | 38,278  |
| Total cost Epidemiologist, €                 | 28,771  |
| Total cost Administrative, €                 | 76,556  |
| Cost per 1 FS letter, €                      | 0.5     |
| Total number of letter                       | 12,350  |
| Total cost Letter x 1° FS, €                 | 6,175   |
| Total cost invitation, €                     | 111,502 |
| <i>Cost invitation per adherent, €</i>       | 30      |
| <b>Endoscopy staff, €</b>                    |         |
| Theoretical adherence to 1° FS               | 30%     |
| 1° FS                                        | 3,705   |
| Theoretical FS repeated rate                 | 6%      |
| 1°FS repeated                                | 225     |
| Total FS                                     | 3,930   |
| Session for FS                               | 164     |
| Post-FS OC theoretical rate                  | 8%      |
| 1° OC                                        | 295     |
| 1° OC theoret. repeated rate                 | 10%     |
| 1° OC repeated                               | 29      |
| Total 1°OC                                   | 324     |
| OC per session                               | 8       |
| Session for OC                               | 41      |
| Endoscopy session per year                   | 204     |
| Yearly cost per 1 endoscopist, €             | 115,084 |
| Yearly cost per 1 nurse, €                   | 45,914  |
| Yearly cost per 1 administrative, €          | 38,278  |
| Endoscopy sessions per year, €               | 204     |
| Total cost Endoscopist, €                    | 126,769 |
| Total cost Nurse, €                          | 101,151 |
| Total cost Administrative, €                 | 38,331  |
| Total cost endoscopy staff, €                | 266,251 |
| <i>Cost End. Staff/adherent, €</i>           | 72      |
| <b>Endoscopy equipment, €</b>                |         |
| Cost 1 Colonoscope                           | 15,151  |
| Cost 1 Video processor and light source, €   | 21,606  |
| Cost 1 Monitor, €                            | 3,209   |
| Cost 1 Dual-scope reprocessing, €            | 29,257  |
| Cost 1 Electrosurgical generator, €          | 6,817   |

|                                                                 |             |
|-----------------------------------------------------------------|-------------|
| Cost 1 Not reusable snare, €                                    | 99          |
| N° Colonoscope                                                  | 6           |
| N° Video processor and light source                             | 1           |
| N° Monitor                                                      | 1           |
| N° Dual-scope reprocessing                                      | 2           |
| N° Electrosurgical generator                                    | 1           |
| N° Not reusable snare                                           | 1           |
| Duration 1 Colonoscope                                          | 3           |
| Duration 1 Video processor and light source                     | 5           |
| Duration 1 Monitor                                              | 10          |
| Duration 1 Dual-scope reprocessing                              | 10          |
| Duration 1 Electrosurgical generator                            | 4           |
| Duration 1 Not reusable snare                                   | 4           |
| Maintenance cost 1 Colonoscope per year, €                      | 516         |
| Maintenance cost 1 Video processor and lig, €ht source per year | 4,105       |
| Maintenance cost 1 Monitor per year, €                          |             |
| Maintenance cost 1 Dual-scope reprocessing per year, €          | 1,980       |
| Maintenance cost 1 Electrosurgical generator per year, €        | 103         |
| Maintenance cost 1 Not reusable snare per year, €               |             |
| Yearly cost Colonoscope, €                                      | 38,063      |
| Yearly cost Video processor and light source, €                 | 8,426       |
| Yearly cost Monitor, €                                          | 321         |
| Yearly cost Dual-scope reprocessing, €                          | 9,811       |
| Yearly cost Electrosurgical generator, €                        | 1,808       |
| Yearly cost Not reusable snare, €                               |             |
| Total yearly cost equipment, €                                  | 58,428      |
| Total cost equipment, €                                         | 58,510      |
| <i>Cost End. Staff/adherent, €</i>                              | <i>15.8</i> |
| <b>Endoscope accessories</b>                                    |             |
| Cost of 1 single-use biopsy forceps, €                          | 11          |
| Cost of 1 single-use biopsy snare, €                            | 26          |
| Cost of 1 cleaning brush long, €                                | 6           |
| Cost of 1 cleaning brush short, €                               | 6           |
| Cost of 1 biopsy valve, €                                       | 2           |
| Cost of 1 water bottle, €                                       | 165         |
| Cost of 1 electric plate, €                                     | 1           |
| Cost of 1 silicon, €                                            | 7           |
| Theor. rate of polyp removed by biopsy forceps                  | 50%         |
| Theor. rate of polyp removed with diathermy                     | 17%         |
| Theoret. prevalence of polyps at FS+post-FS OC                  | 31%         |
| Total number of polypectomies with biopsy forceps               | 583         |
| Total number of polypectomies with snare                        | 583         |
| Total number of polypectomies with diathermy                    | 192         |
| Total cost of polypectomies with biopsy forceps, €              | 6,281       |

|                                                        |            |
|--------------------------------------------------------|------------|
| Total cost of polypectomies with snare, €              | 14,868     |
| Total cost of polypectomies with diathermy, €          | 209        |
| Total cost polypectomy, €                              | 21,358     |
| Theoretical number of end. with 1 clean brusher long   | 20         |
| Theoretical number of end. with 1 clean brusher short  | 50         |
| Theoretical number of end. with 1 biopsy valve         | 60         |
| Theoretical number of end. with 1 water bottle         | 4,254      |
| Theoretical number of end. with 1 silicon              | 150        |
| Total number of clean brusher long                     | 213        |
| Total number of clean brusher short                    | 85         |
| Total number of biopsy valve                           | 71         |
| Total number of water bottle                           | 1          |
| Total number of silicon                                | 28         |
| Total cost of clean brusher long, €                    | 1,366      |
| Total cost of clean brusher short, €                   | 547        |
| Total cost of biopsy valve, €                          | 165        |
| Total cost of water bottle, €                          | 165        |
| Total cost of silicon, €                               | 187        |
| Total cost accessories, €                              | 2,431      |
| Total cost endoscopy accessories, €                    | 23,789     |
| <i>Cost End. accessories/adherent, €</i>               | <i>6.4</i> |
| <b>Disposable material</b>                             |            |
| Cost of 1 Anallergic gloves, €                         | 0.03       |
| Cost of 1 Polhyethylene gloves, €                      | 0.01       |
| Cost of 1 Latex gloves, €                              | 0.02       |
| Cost of 1 Syringe 2.5 ml, €                            | 0.09       |
| Cost of 1 Syringe 60 ml, €                             | 0.20       |
| Cost of 1 Lubrificant, €                               | 0.17       |
| Cost of 1 Gauze, €                                     | 0.04       |
| Cost of 1 Disposable bed linen, €                      | 0.45       |
| Cost of 1 Buscopan, €                                  | 0.25       |
| Cost of 1 Midazolam, €                                 | 2.42       |
| Cost of 1 Pethidine, €                                 | 0.77       |
| VAT, €                                                 | 20%        |
| Theoretical number of end. with 1 Anallergic gloves    | 1.25       |
| Theoretical number of end. with 1 Polhyethylene gloves | 1.25       |
| Theoretical number of end. with 1 Latex gloves         | 1.25       |
| Theoretical number of end. with 1 Syringe 2.5 ml       | 2%         |
| Theoretical number of end. with 1 Syringe 60 ml        | 7%         |
| Theoretical number of end. with 1 Lubrificant          | 0.50       |
| Theoretical number of end. with 1 Gauze                | 1.00       |
| Theoretical number of end. with 1 Disposable bed linen | 1.00       |
| Theoretical number of end. with 1 Buscopan             | 7%         |
| Theoretical number of end. with 1 Midazolam            | 8%         |

|                                             |            |
|---------------------------------------------|------------|
| Theoretical number of end. with 1 Pethidine | 0.4%       |
| Total number of Anallergic gloves           | 3,403      |
| Total number of Polhyethylene gloves        | 3,403      |
| Total number of Latex gloves                | 3,403      |
| Total number of Syringe 2.5 ml              | 101        |
| Total number of Syringe 60 ml               | 277        |
| Total number of Lubrificant                 | 8,509      |
| Total number of Gauze                       | 4,254      |
| Total number of Disposable bed linen        | 4,254      |
| Total number of Buscopan                    | 288        |
| Total number of Midazolam                   | 328        |
| Total number of Pethidine                   | 16         |
| Total cost of Anallergic gloves, €          | 112        |
| Total cost of Polhyethylene gloves, €       | 19         |
| Total cost of Latex gloves, €               | 75         |
| Total cost of Syringe 2.5 ml, €             | 9          |
| Total cost of Syringe 60 ml, €              | 55         |
| Total cost of Lubrificant, €                | 1,404      |
| Total cost of Gauze, €                      | 187        |
| Total cost of Disposable bed linen, €       | 1,919      |
| Total cost of Buscopan, €                   | 73         |
| Total cost of Midazolam, €                  | 794        |
| Total cost of Pethidine, €                  | 12         |
| Total cost disposable material, €           | 4,658      |
| VAT, €                                      | 932        |
| Total cost disposable material+VAT, €       | 5,590      |
| <i>Cost End. accessories/adherent, €</i>    | <i>1.5</i> |
| <b>Hospital furniture</b>                   |            |
| Cost of 1 Bed, €                            | 11,362     |
| Cost of 1 PC+printer, €                     | 2,840      |
| Cost of 1 Seats, €                          | 109        |
| Cost of 1 Desk, €                           | 233        |
| Cost of 1 Stool, €                          | 327        |
| Cost of 1 Aspiration system, €              | 28,405     |
| Duration of 1 Bed                           | 10         |
| Duration of 1 PC+printer                    | 5          |
| Duration of 1 Seats                         | 10         |
| Duration of 1 Desk                          | 10         |
| Duration of 1 Stool                         | 10         |
| Duration of 1 Aspiration system             | 10         |
| Theoretical number of Bed                   | 1          |
| Theoretical number of PC+printer            | 2          |
| Theoretical number of Seats                 | 3          |
| Theoretical number of Desk                  | 2          |

|                                         |             |
|-----------------------------------------|-------------|
| Theoretical number of Stool             | 2           |
| Theoretical number of Aspiration system | 1           |
| Total cost of Bed, €                    | 1,136       |
| Total cost of PC+printer, €             | 1,136       |
| Total cost of Seats, €                  | 33          |
| Total cost of Desk, €                   | 47          |
| Total cost of Stool, €                  | 65          |
| Total cost of Aspiration system, €      | 2,841       |
| Tota yearly cost of furniture, €        | 5,257       |
| Total cost of furniture, €              | 5,265       |
| <i>Cost furniture/adherent, €</i>       | <i>1.4</i>  |
| <b>Endoscopic surveillance</b>          |             |
| PPV advanced adenomas                   | 5%          |
| N° advanced adenomas                    | 177         |
| Cost each surveillance OC, €            | 213         |
| N° surveillance OC                      | 2           |
| Yearly cost surveillance, €             | 75,340      |
| <i>Cost surveillance/adherent, €</i>    | <i>20.3</i> |
| <b>Other costs</b>                      |             |
| Cost of 1 histological examination, €   | 35          |
| Cost of 1 CTC, €                        | 165         |
| Cost of Prep for 1 FS, €                | 0.6         |
| Cost of Prep for 1 OC, €                | 1.0         |
| Cost yearly informatic system, €        | 61,325      |
| Polyps retrieved for histology          | 95%         |
| Incomplete OC                           | 7%          |
| Number of histological examination      | 1,107       |
| Number of CTC                           | 23          |
| Number of Prep for FS                   | 3,705       |
| Number of Prep for OC                   | 549         |
| Number of informatic system             | 1.0         |
| Cost of histological examination, €     | 39,209      |
| Cost of CTC, €                          | 3,745       |
| Cost of Prep for FS, €                  | 2,242       |
| Cost of Prep for OC, €                  | 568         |
| Cost of informatic system, €            | 61,410      |
| Total cost of other, €                  | 107,173     |
| <i>Cost furniture/adherent, €</i>       | <i>28.9</i> |

(b)

|                                              | 1° round  | ≥2° round |
|----------------------------------------------|-----------|-----------|
| <b>Programme organization and evaluation</b> |           |           |
| Patients invitable                           | 63,000    | 77,200    |
| Yearly cost per 1 epidemiologist, €          | 115,084   | 115,084   |
| Yearly cost per 1 administrative, €          | 38,278    | 38,278    |
| Total cost Epidemiologist, €                 | 28,771    | 28,771    |
| Total cost Administrative, €                 | 76,556    | 76,556    |
| Cost per 1 FIT letter, €                     | 0.5       | 0.5       |
| Total number of letter                       | 63,000.0  | 77,200.0  |
| Total cost Letter x 1° FIT, €                | 31,500    | 38,600    |
| Total cost invitation, €                     | 136,827   | 143,927   |
| <i>cost invitation per adherent, €</i>       | <i>5</i>  | <i>3</i>  |
| <b>Endoscopy staff+ cost FIT</b>             |           |           |
| Theoretical adherence to 1° FIT              | 42%       | 60%       |
| Total N° FIT                                 | 26,460    | 46,320    |
| Post-FIT OC rate                             | 7%        | 4%        |
| OC compliance                                | 80%       | 80%       |
| 1° OC theoret. repeated rate                 | 10%       | 10%       |
| 1° OC repeated                               | 148       | 148       |
| Total 1°OC                                   | 1,630     | 1,630     |
| OC per session                               | 8         | 8         |
| Yearly cost per 1 endoscopist, €             | 115,084   | 115,084   |
| Yearly cost per 1 nurse, €                   | 45,914    | 45,914    |
| Yearly cost per 1 administrative, €          | 38,278    | 38,277    |
| Endoscopy sessions per year                  | 204       | 204       |
| Total cost Endoscopist, €                    | 126,432   | 126,473   |
| Total cost Nurse, €                          | 100,883   | 100,916   |
| Cost 1 FIT, €                                | 4.2       | 4.2       |
| Total cost FIT, €                            | 111,132   | 194,544   |
| Total cost Administrative, €                 | 38,229    | 38,242    |
| Total cost endoscopy staff and FIT, €        | 376,681   | 460,179   |
| <i>Cost End. Staff and FIT/adherent, €</i>   | <i>14</i> | <i>10</i> |
| <b>Endoscopy equipment</b>                   |           |           |
| Cost 1 Colonoscope, €                        | 15,151    | 15,151    |
| Cost 1 Video processor and light source, €   | 21,606    | 21,606    |
| Cost 1 Monitor, €                            | 3,209     | 3,209     |
| Cost 1 Dual-scope reprocessing, €            | 29,257    | 29,257    |
| Cost 1 Electrosurgical generator, €          | 6,817     | 6,817     |
| Cost 1 Not reusable snare, €                 | 99        | 99        |
| N° Colonoscope                               | 3         | 3         |
| N° Video processor and light source          | 1         | 1         |
| N° Monitor                                   | 1         | 1         |

|                                                               |            |            |
|---------------------------------------------------------------|------------|------------|
| N° Dual-scope reprocessing                                    | 1          | 1          |
| N° Electrosurgical generator                                  | 1          | 1          |
| N° Not reusable snare                                         | 1          | 1          |
| Duration 1 Colonoscope                                        | 3          | 3          |
| Duration 1 Video processor and light source                   | 5          | 5          |
| Duration 1 Monitor                                            | 10         | 10         |
| Duration 1 Dual-scope reprocessing                            | 10         | 10         |
| Duration 1 Electrosurgical generator                          | 4          | 4          |
| Duration 1 Not reusable snare                                 | 4          | 4          |
| Maintenance cost 1 Colonoscope per year, €                    | 516        | 516        |
| Maintenance cost 1 Video processor + light source per year, € | 4,105      | 4,105      |
| Maintenance cost 1 Monitor per year, €                        |            |            |
| Maintenance cost 1 Dual-scope reprocessing per year, €        | 1,980      | 1,980      |
| Maintenance cost 1 Electrosurgical generator per year, €      | 103        | 103        |
| Maintenance cost 1 Not reusable snare per year, €             |            |            |
| Yearly cost Colonoscope, €                                    | 19,031     | 19,031     |
| Yearly cost Video processor and light source, €               | 8,426      | 8,426      |
| Yearly cost Monitor, €                                        | 321        | 321        |
| Yearly cost Dual-scope reprocessing, €                        | 6,885      | 6,885      |
| Yearly cost Electrosurgical generator, €                      | 1,808      | 1,808      |
| Yearly cost Not reusable snare, €                             |            |            |
| Total yearly cost equipment, €                                | 36,471     | 36,471     |
| Total cost equipment, €                                       | 36,425     | 36,437     |
| <i>Cost End. Staff/adherent, €</i>                            | <i>1.4</i> | <i>0.8</i> |
| <b>Endoscope accessories</b>                                  |            |            |
| Cost of 1 single-use biopsy forceps, €                        | 11         | 10.8       |
| Cost of 1 single-use biopsy snare, €                          | 26         | 25.5       |
| Cost of 1 cleaning brush long, €                              | 6          | 6.4        |
| Cost of 1 cleaning brush short, €                             | 6          | 6.4        |
| Cost of 1 biopsy valve, €                                     | 2          | 2.3        |
| Cost of 1 water bottle, €                                     | 165        | 165.0      |
| Cost of 1 electric plate, €                                   | 1          | 1.1        |
| Cost of 1 silicon, €                                          | 7          | 6.6        |
| Theor. rate of polyp removed by biopsy forceps                | 50%        | 50%        |
| Theor. rate of polyp removed with diathermy                   | 17%        | 17%        |
| Theoret. prevalence of polyps at FIT+post-FS OC               | 50%        | 50%        |
| Total number of polypectomies with biopsy forceps             | 6,615      | 11,580     |
| Total number of polypectomies with snare                      | 6,615      | 11,580     |
| Total number of polypectomies with diathermy                  | 2,183      | 3,821      |
| Total cost of polypectomies with biopsy forceps, €            | 71,310     | 124,832    |
| Total cost of polypectomies with snare, €                     | 168,815    | 295,522    |
| Total cost of polypectomies with diathermy, €                 | 2,377      | 4,162      |
| Total cost polypectomy, €                                     | 242,502    | 424,516    |
| Theoretical number of end. with 1 clean brush long            | 20         | 20         |

|                                                        |            |            |
|--------------------------------------------------------|------------|------------|
| Theoretical number of end. with 1 clean brusher short  | 50         | 50         |
| Theoretical number of end. with 1 biopsy valve         | 60         | 60         |
| Theoretical number of end. with 1 water bottle         | 28,090     | 47,950     |
| Theoretical number of end. with 1 silicon              | 150        | 150        |
| Total number of clean brusher long                     | 1,404      | 2,398      |
| Total number of clean brusher short                    | 562        | 959        |
| Total number of biopsy valve                           | 468        | 799        |
| Total number of water bottle                           | 1          | 1          |
| Total number of silicon                                | 187        | 320        |
| Total cost of clean brusher long, €                    | 9,022      | 15,402     |
| Total cost of clean brusher short, €                   | 3,609      | 6,161      |
| Total cost of biopsy valve, €                          | 1,092      | 1,864      |
| Total cost of water bottle, €                          | 165        | 165        |
| Total cost of silicon, €                               | 1,236      | 2,110      |
| Total cost accessories, €                              | 15,124     | 25,701     |
| Total cost endoscopy accessories, €                    | 257,626    | 450,216    |
| <i>Cost End. accessories/adherent, €</i>               | <i>9.7</i> | <i>9.7</i> |
| <b>Disposable material</b>                             |            |            |
| Cost of 1 Anallergic gloves, €                         | 0.03       | 0.03       |
| Cost of 1 Polhyethylene gloves, €                      | 0.01       | 0.01       |
| Cost of 1 Latex gloves, €                              | 0.02       | 0.02       |
| Cost of 1 Syringe 2.5 ml, €                            | 0.09       | 0.09       |
| Cost of 1 Syringe 60 ml, €                             | 0.20       | 0.20       |
| Cost of 1 Lubrificant, €                               | 0.17       | 0.17       |
| Cost of 1 Gauze, €                                     | 0.04       | 0.04       |
| Cost of 1 Disposable bed linen, €                      | 0.45       | 0.45       |
| Cost of 1 Buscopan, €                                  | 0.25       | 0.25       |
| Cost of 1 Midazolam, €                                 | 2.42       | 2.42       |
| Cost of 1 Pethidine, €                                 | 0.77       | 0.77       |
| VAT                                                    | 20%        | 20%        |
| Theoretical number of end. with 1 Anallergic gloves    | 1.25       | 1.25       |
| Theoretical number of end. with 1 Polhyethylene gloves | 1.25       | 1.25       |
| Theoretical number of end. with 1 Latex gloves         | 1.25       | 1.25       |
| Theoretical number of end. with 1 Syringe 2.5 ml       | 0%         | 0%         |
| Theoretical number of end. with 1 Syringe 60 ml        | 1%         | 1%         |
| Theoretical number of end. with 1 Lubrificant          | 0.50       | 0.50       |
| Theoretical number of end. with 1 Gauze                | 1.00       | 1.00       |
| Theoretical number of end. with 1 Disposable bed linen | 1.00       | 1.00       |
| Theoretical number of end. with 1 Buscopan             | 1%         | 1%         |
| Theoretical number of end. with 1 Midazolam            | 1%         | 1%         |
| Theoretical number of end. with 1 Pethidine            | 0.1%       | 0.0%       |
| Total number of Anallergic gloves                      | 22,472     | 38,360     |
| Total number of Polhyethylene gloves                   | 22,472     | 38,360     |
| Total number of Latex gloves                           | 22,472     | 38,360     |



|                                          |            |            |
|------------------------------------------|------------|------------|
| Total number of Syringe 2.5 ml           | 101        | 101        |
| Total number of Syringe 60 ml            | 277        | 277        |
| Total number of Lubrificant              | 56,180     | 95,901     |
| Total number of Gauze                    | 28,090     | 47,950     |
| Total number of Disposable bed linen     | 28,090     | 47,950     |
| Total number of Buscopan                 | 288        | 288        |
| Total number of Midazolam                | 328        | 328        |
| Total number of Pethidine                | 16         | 16         |
| Total cost of Anallergic gloves, €       | 742        | 1,266      |
| Total cost of Polhyethilene gloves, €    | 124        | 211        |
| Total cost of Latex gloves, €            | 494        | 844        |
| Total cost of Syringe 2.5 ml, €          | 9          | 9          |
| Total cost of Syringe 60 ml, €           | 55         | 55         |
| Total cost of Lubrificant, €             | 9,270      | 15,824     |
| Total cost of Gauze, €                   | 1,236      | 2,110      |
| Total cost of Disposable bed linen, €    | 12,669     | 21,626     |
| Total cost of Buscopan, €                | 73         | 73         |
| Total cost of Midazolam, €               | 794        | 794        |
| Total cost of Pethidine, €               | 12         | 12         |
| Total cost disposable material, €        | 25,476     | 42,823     |
| VAT                                      | 5,095      | 8,565      |
| Total cost disposable material+VAT, €    | 30,572     | 51,387     |
| <i>Cost End. accessories/adherent, €</i> | <i>1.2</i> | <i>1.1</i> |
| <b>Hospital furniture</b>                |            |            |
| Cost of 1 Bed, €                         | 11,361     | 11,361     |
| Cost of 1 PC+printer, €                  | 2,840      | 2,840      |
| Cost of 1 Seats, €                       | 108.90     | 108.90     |
| Cost of 1 Desk, €                        | 233.20     | 233.20     |
| Cost of 1 Stool, €                       | 326.70     | 326.70     |
| Cost of 1 Aspiration system, €           | 28,405     | 28,405     |
| Duration of 1 Bed                        | 10         | 10         |
| Duration of 1 PC+printer                 | 5          | 5          |
| Duration of 1 Seats                      | 10         | 10         |
| Duration of 1 Desk                       | 10         | 10         |
| Duration of 1 Stool                      | 10         | 10         |
| Duration of 1 Aspiration system          | 10         | 10         |
| Theoretical number of Bed                | 1          | 1          |
| Theoretical number of PC+printer         | 2          | 2          |
| Theoretical number of Seats              | 3          | 3          |
| Theoretical number of Desk               | 2          | 2          |
| Theoretical number of Stool              | 2          | 2          |
| Theoretical number of Aspiration system  | 1          | 1          |
| Total cost of Bed, €                     | 1,136      | 1,136      |
| Total cost of PC+printer, €              | 1,136      | 1,136      |

|                                       |            |            |
|---------------------------------------|------------|------------|
| Total cost of Seats, €                | 33         | 33         |
| Total cost of Desk, €                 | 47         | 47         |
| Total cost of Stool, €                | 65         | 65         |
| Total cost of Aspiration system, €    | 2,841      | 2,841      |
| Tota yearly cost of furniture, €      | 5,257      | 5,257      |
| Total cost of furniture, €            | 5,251      | 5,253      |
| <i>Cost furniture/adherent, €</i>     | <i>0.2</i> | <i>0.1</i> |
| <b>Endoscopic surveillance</b>        |            |            |
| PPV advanced adenomas                 | 35%        | 28%        |
| N° advanced adenomas                  | 570        | 457        |
| Cost each surveillance OC, €          | 213        | 213        |
| N° surveillance OC                    | 2          | 2          |
| Yearly cost surveillance, €           | 243,023    | 194,482    |
| <i>Cost surveillance/adherent</i>     | <i>9.2</i> | <i>4.2</i> |
| <b>Other costs</b>                    |            |            |
| Cost of 1 histological examination, € | 35.42      | 35.42      |
| Cost of 1 CTC, €                      | 165        | 165        |
| Cost of Prep for 1 OC, €              | 1.03       | 1.03       |
| Cost yearly informatic system, €      | 61,325     | 61,325     |
| Polyps retrieved for histology        | 95%        | 95%        |
| Incomplete OC                         | 7%         | 7%         |
| Number of histological examination    | 774        | 774        |
| Number of CTC                         | 114        | 114        |
| Number of Prep for FS                 |            |            |
| Number of Prep for OC                 | 1,630      | 1,630      |
| Number of informatic system           | 1.0        | 1.0        |
| Cost of histological examination, €   | 27,423     | 27,432     |
| Cost of CTC, €                        | 18,826     | 18,832     |
| Cost of Prep for FS, €                | 0          | 0          |
| Cost of Prep for OC, €                | 1,685      | 1,686      |
| Cost of informatic system, €          | 61,247     | 61,267     |
| Total cost of other, €                | 109,181    | 109,217    |
| <i>Cost other/adherent, €</i>         | <i>4.1</i> | <i>2.4</i> |

## APPENDIX 2

### Assumptions concerning screening parameters.

#### 1) FS

**Attendance rate.** A 30% compliance to FS in the Piedmont CRC screening programme has been recently reported.<sup>10</sup> This data already incorporated the additional effect due to subsequent remainders sent to non-adherent screenees.

**Efficacy.** In two large RCT on the efficacy of FS for CRC screening, CRC incidence and mortality reduction at per protocol analysis (i.e. those needed for our model) were 33% and 31%, and 43% and 38%, respectively, after a mean follow up of 11.2 years.<sup>7,8</sup> The slight discrepancy in mortality estimate was referred to the different length of the studies (12 vs. 11 years) and to a lower colorectal cancer mortality in the trial control arm compared to the source population in one study, thus the highest estimate was included in the model.

**Costs.** To assess the cumulative cost of a single FS procedure, we firstly computed the cumulative 1-year direct cost of a FS organized screening programme, by dividing it in six main chapters, namely endoscopy staff, endoscopic equipment, endoscopy accessories, disposable material, hospital furniture, and general administrative costs. Secondly, we divided this 1-year cost estimate by the expected number of subjects to be examined with FS within 1 year in order to fill in the endoscopic sessions planned in the same time frame (i.e. 204), when including both FS and FS-induced TCs. The cost of FS- and TC-related polypectomies (including histology) was based on the polyp detection rate assessed within the Piedmont region FS programme. Thus, although *polyps* were not considered for the efficacy assessment in our model, they were included in the cost analysis. Of note, the detection rates measured within the regional programme was an adequate and certain source of information, so that the inclusion of this information did not weak the reliability of the model, since no simulation of the adenoma-carcinoma sequence was needed for estimating the polypectomy cost. This also applies to FIT-strategy

(see below). No post-polypectomy surveillance was simulated in the reference case scenario, given the uncertainty concerning the impact of surveillance on CRC risk and the wide variability in the surveillance protocols adopted by different programmes, which would limit the generalisability of estimates based on the active surveillance protocol adopted in the Piedmont organized screening programme. However, in the sensitivity analysis, post-polypectomy surveillance was simulated only for advanced adenomas, as recommended by the *European guidelines for quality assurance in colorectal cancer screening and diagnosis*.<sup>3</sup> The downstaging efficacy of FS on prevalent cancer was also included in the cost analysis, because of the lower cost of treatment in the earlier than in the later stages. For this purpose, the stage distribution of FS-screen detected CRC was extracted by the Piedmont regional screening programme.

## 2) **FIT**

**Attendance rate.** A 42% compliance to initial invitation of FIT has been shown during the ongoing programme in Piedmont where 307,600 eligible subjects has been invited in the period 2010-2011. In a recent study based on a sequence of 4 FIT performed in a Piedmont-adjacent region<sup>17</sup>, an additional 15% adherence was shown for non-adherent subjects at each of the biennially re-invitations. Thus, the cumulative adherence simulated in the model was the sum of the initial adherence and that to repeated invitation in the five subsequent rounds. In the same study, adherent subjects showed a 85% compliance at each of the biennially repeated invitations, whilst non-compliant in any round showed a 15% compliance to any of the subsequent invitations. These rates were also included in the model.

**Efficacy.** One cohort study based on an Italian biennial FIT programme and including 6,961 attendees and 26,285 non-attendees subjects, respectively, showed a 22% and 26% reduction in colorectal cancer incidence and mortality, respectively, for a 12-year period.<sup>9</sup> These data of efficacy were applied to the adherent-screenees of the simulated cohort. Thus, the simulated effect would start at the beginning of the simulation for those who were adherent to the initial invitation, and from the following years to

those who accepted the invitation only at the subsequent rounds (see adherence section above). On the other hand, these data also incorporated a suboptimal compliance to repeated FIT invitations, so that no adjustment for compliance was needed.

### **3) FS+FIT for non-adherent to FS**

It is routine policy in the Piedmont region to re-invite subjects non-adherent to FS to FIT. This has been recently reported in a North-Italy cohort (Turin, Verona).<sup>10</sup> Briefly in an initial FS-screening cohort of 63,718 subjects, 19.3% of those non-responders to FIT underwent a FIT, when re-invited. This value was used as baseline value in our analysis. All the remaining inputs in this simulation were entirely taken from what already reported separately for FS and FIT in the above sections.

### **APPENDIX 3.**

To estimate the distribution of expected costs and efficacy of the screening strategies dependent on the uncertainty in the input parameters, Monte Carlo (MC) simulation was used to repeatedly sample from the distributions assigned to all the uncertain parameters shown in Table 3. For each MC iteration, the NB for each strategy was computed, in order to represent the possible values of NB for all the possible realizations of the uncertain parameters. For each MC iteration, the maximum NB among all the strategies was also calculated in order to estimate the total expected value of perfect information (EVPI) per subject. The expected value of a decision taken with perfect information (i.e. the identification of the optimal test) was found by averaging the maximum net benefit over the joint distribution of the included parameters (i.e. average of the maximum NBs of all the 10,000 iterations). The difference between the maximum NB with perfect information and the maximum NB with current information corresponds to the total EVPI per subject.

An analysis of the EVPI associated with particular subsets of model parameters was also conducted (partial EVPI) to indicate what type of additional evidence would be most valuable. Partial EVPI was calculated as the difference between the expected net benefit with perfect information about the parameters of interest and the expected value with current information. Subsequently, we estimated the expected value for the entire population that can potentially benefit from more research (population EVPI).

#### APPENDIX 4.

Cost, effect and net benefit for all the included strategies for a cohort of 100,000 subjects invited for screening, when assuming equal adherence among all the strategies.

|                                                    | <b>No screening</b> | <b>FS</b>                    | <b>FIT</b> | <b>FS + FIT</b>              |
|----------------------------------------------------|---------------------|------------------------------|------------|------------------------------|
| <b>CRC cases, n</b>                                | 1,517               | 1,313                        | 1,312      | 1,224                        |
| <b>CRC deaths, n</b>                               | 528                 | 432                          | 442        | 395                          |
| <b>CRC prevented, %</b>                            | -                   | 13%                          | 14%        | 19%                          |
| <b>CRC deaths prevented, %</b>                     | -                   | 18%                          | 16%        | 25%                          |
| <b>Life-years lost, n</b>                          | 19,431              | 17,463                       | 17,700     | 16,712                       |
| <b>Life-years saved, n<sup>§</sup></b>             | -                   | 1,969                        | 1,731      | 2,719                        |
| <b>Life-years saved discounted, n</b>              | -                   | 1,689                        | 1,460      | 2,312                        |
| <b>Cost CRC care, €<sup>§</sup></b>                | 44,294,628          | 34,393,357                   | 38,503,258 | 32,716,202                   |
| <b>Cost screening, €<sup>§</sup></b>               | -                   | 6,450,886                    | 6,146,373  | 5,884,306                    |
| <b>Total cost, €<sup>§</sup></b>                   | 44,294,628          | 40,844,243                   | 44,649,631 | 38,600,508                   |
| <b>Total cost discounted, €</b>                    | 37,884,430          | 35,866,930                   | 38,400,217 | 36,832,184                   |
| <b>ICER vs no screening, € per life-year saved</b> | -                   | <b>€20 saving per person</b> | 353        | <b>€11 saving per person</b> |
| <b>MNB*,€</b>                                      | -                   | 48,591,072                   | 34,599,573 | 78,790,042                   |

CRC: colorectal cancer; FS: flexible sigmoidoscopy; FIT: immunochemical faecal test;

MNB: mean net benefit;

ICER: Incremental cost-effectiveness ratio;

<sup>§</sup>Not discounted;

\* Mean net benefit was calculated by multiplying effect by willingness to pay and subtracting cost.

Willingness to pay was assumed to be €50,000 per life-year saved.

## APPENDIX 5.

Cost-effectiveness among the different strategies, according to the reference case scenario, when simulating screening between 50 and 75 years of age (sensitivity analysis). Non-dominated strategies are connected by a continuous line. Differently from the reference case scenario, we simulated a 10% additional increase in the attendance to FS related with a re-invitation at 65 years in the FS only strategy. FS cost-effectiveness improved, but was still not competitive with the sequential strategies.

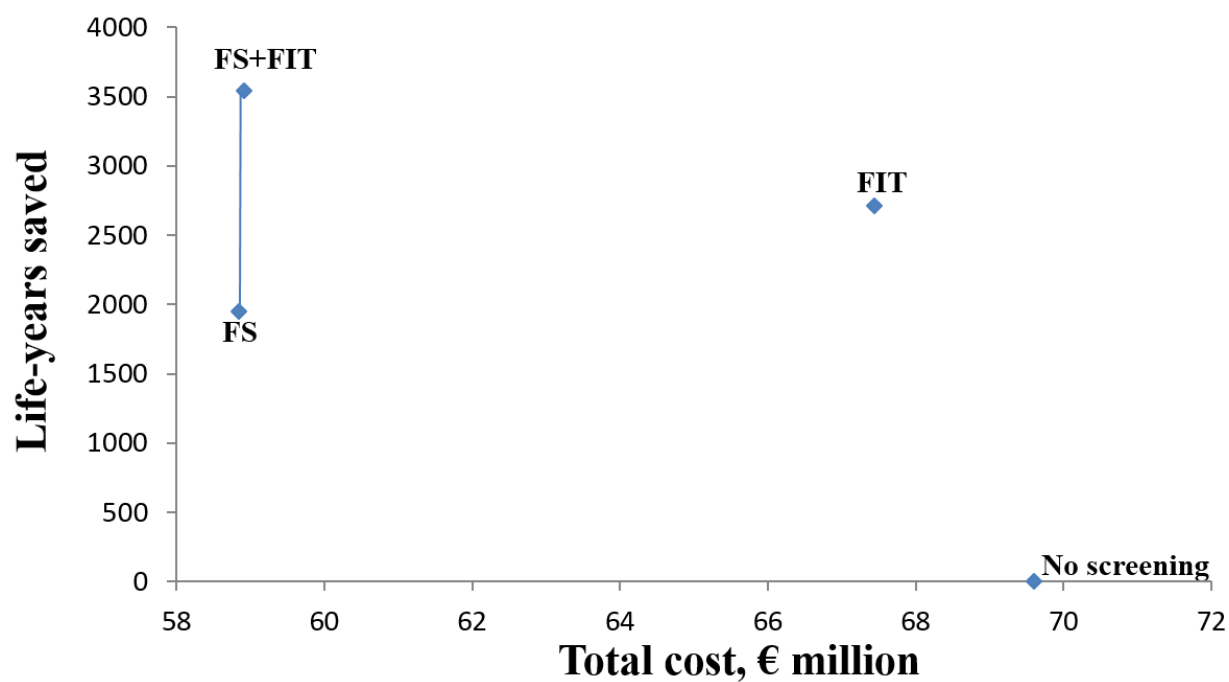

Supplement: Supplementary file 1 [file 12968333]
